# Supplementary figures and images for: Intraspecific Chloroplast Genome Variation and Domestication Origins of Major Cultivars of Styphnolobium japonicum
Source: MDPI journal article supplement (doi:10.3390/genes14061156), 2023-05-26

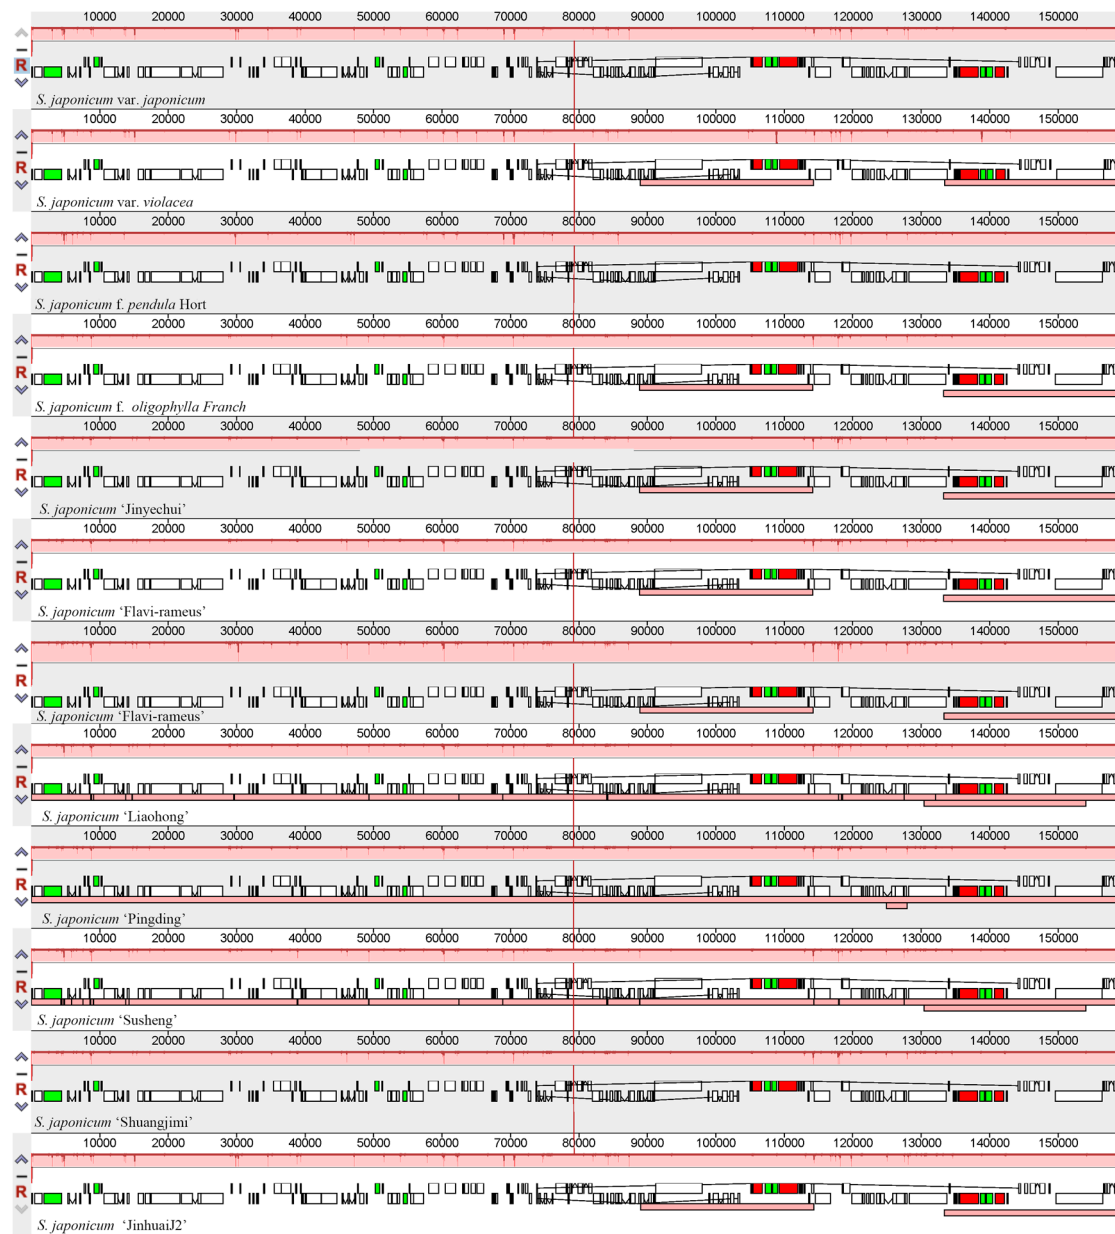

Figure S2: Collinear analysis of the chloroplast genome of twelve *S. japonicum* samples.

Supplement: s1 [file s1]
